# Supplementary material
Source: PubMed Central journal article supplement (PMC6157632)
Supplement: NIHMS1506731-supplement-1.pdf [file NIHMS1506731-supplement-1.pdf]

**Cell Reports, Volume 24**

**Supplemental Information**

**Differential Splicing of ANP32A in Birds  
Alters Its Ability to Stimulate RNA Synthesis  
by Restricted Influenza Polymerase**

**Steven F. Baker, Mitchell P. Ledwith, and Andrew Mehle**

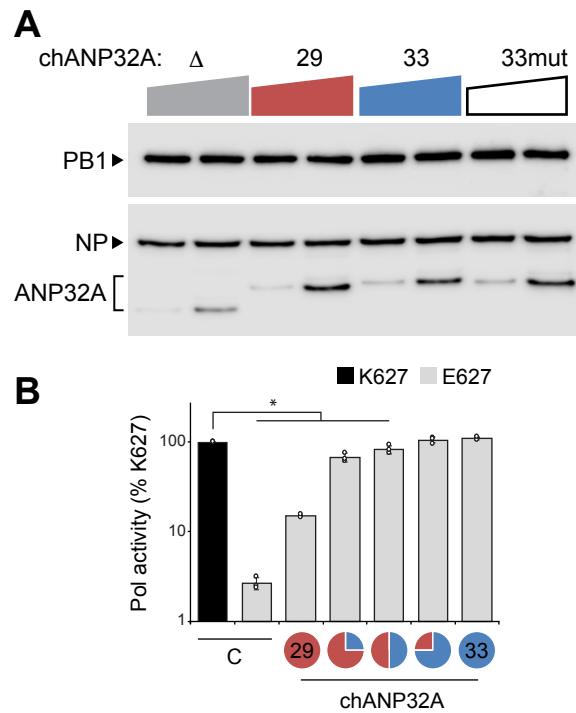

**Figure S1. Comparison of ANP32A isoform expression levels and compatibility. Related to Figure 2.** (A) ANP32A variants are expressed at similar levels. Samples from Fig 2D containing the two highest amounts of each ANP32A variant were re-run on the same gel to enable comparison. Proteins were detected by western blot. (B) PB2 E627 polymerase activity is enhanced when the predominant avian ANP32A isoforms are expressed alone or in combination. Total amounts of chANP32A added to the PB2 E627 polymerase activity assays remained constant, while the proportions of chANP32A<sub>29</sub> and chANP32A<sub>33</sub> were varied as represented in the pie charts. Data are shown as means (columns) of  $n = 3$  technical replicates (dots)  $\pm$  SD. Representative results of at least 3 independent biological replicates. C = empty vector control. \* $p < 0.05$ , (Student's T-test) between PB2 K627 and E627 at each condition.

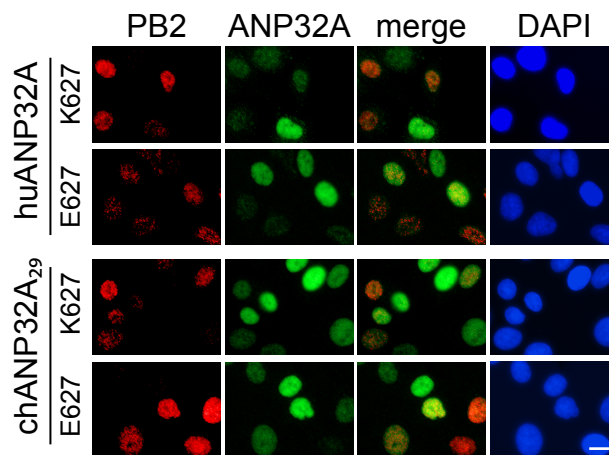

**Figure S2. PB2 and ANP32A localize to the nucleus. Related to Figure 2.** A549 cells were transduced with the indicated ANP32A and infected with PB2 K627 or PB2 E627 WSN (MOI, 1) for 5 h. PB2 (FLAG) and ANP43A (V5) were detected by Immunofluorescence. Nuclei were identified by DAPI staining. Scale bar, 10  $\mu$ m.

Table S1. Data underlying graphics presented in Fig 1B-D with references to original source sequencing files. Related to Figure 1.

| NCBI Reference Sequence | Region            | RNA-Seq SRA |            | Phylogenetic tree branch | Genus species                | Common name             | notes                   | +VLSL |            |       | -VLSL     |       |       | ex 5 skipping ex 5-6 |  |  |            |
|-------------------------|-------------------|-------------|------------|--------------------------|------------------------------|-------------------------|-------------------------|-------|------------|-------|-----------|-------|-------|----------------------|--|--|------------|
|                         |                   | GeneID no.  | ID no.     |                          |                              |                         |                         | reads | %          | reads | %         | reads | reads | %                    |  |  |            |
| NW_009270572.1          | 237801-247220     | 104139231   | SRR504696  | Ostrich                  | Struthio camelus australis   | South African ostrich   | <i>no insert/repeat</i> |       |            |       |           |       |       |                      |  |  | <b>100</b> |
| NW_014000784.1          | 62380-87756       | 106492272   | ERR522068  | Tinamous & allies        | Apteryx australis mantelli   | North Island brown kiwi | <i>no insert/repeat</i> |       |            |       |           |       |       |                      |  |  | <b>100</b> |
| NW_013185803.1          | 860304-876465     | 106043638   | SRR1796005 | Waterfowl                | Anser cygnoides domesticus   | Swan goose              |                         | 226   | <b>26</b>  | 12    | <b>1</b>  | 525   | 201   | <b>72</b>            |  |  |            |
| NW_004677346.1          | 204119-216117     | 101805403   | SRR1796027 | Waterfowl                | Anas platyrhynchos           | Mallard                 |                         | 374   | <b>88</b>  | 45    | <b>11</b> | 9     | 666   | <b>1</b>             |  |  |            |
| NC_034417.1             | 18981267-19002520 | 110403929   | SRR1795827 | Landfowl                 | Numida meleagris             | Helmeted guineafowl     |                         | 262   | <b>85</b>  | 47    | <b>15</b> |       |       |                      |  |  |            |
| NW_015438805.1          | 1706835-1724257   | 107318936   | SRR5912687 | Landfowl                 | Coturnix japonica            | Japanese quail          |                         | 28    | <b>57</b>  | 12    | <b>24</b> | 5     | 22    | <b>19</b>            |  |  |            |
| NT_455925.1             | 1152927-1173155   | 415562      | SRR5823193 | Landfowl                 | Gallus gallus                | Red junglefowl          |                         | 171   | <b>77</b>  | 51    | <b>23</b> |       |       |                      |  |  |            |
| NC_015022.2             | 18498947-18516371 | 100547535   | SRR1796077 | Landfowl                 | Meleagris gallopavo          | Wild turkey             |                         | 299   | <b>74</b>  | 105   | <b>26</b> |       |       |                      |  |  |            |
| NW_004973680.1          | 4318444-4340310   | 102093694   | SRR5878854 | Doves                    | Columba livia                | Rock pigeon             |                         | 3922  | <b>95</b>  | 68    | <b>2</b>  | 102   | 2854  | <b>3</b>             |  |  |            |
| NW_015090969.1          | 1121007-1145953   | 106894196   | ERR1018134 | Shorebirds               | Calidris pugnax              | Ruff                    |                         | 277   | <b>77</b>  | 12    | <b>3</b>  | 67    | 279   | <b>19</b>            |  |  |            |
|                         |                   |             | SRR3218026 | Shorebirds               | Leucophaeus atricilla        | Laughing gull           |                         | 23    | <b>100</b> | 0     | <b>0</b>  |       |       |                      |  |  |            |
| NW_008795371.1          | 4618727-4683148   | 103899909   | SRR1693186 | Penguins                 | Aptenodytes forsteri         | Emperor penguin         |                         | 43    | <b>55</b>  | 0     | <b>0</b>  | 30    | 37    | <b>45</b>            |  |  |            |
| NW_011950872.1          | 22765800-22788757 | 105412387   | SRR1817947 | Eagles, Hawks            | Aquila chrysaetos canadensis | American golden eagle   |                         | 268   | <b>100</b> | 0     | <b>0</b>  |       |       |                      |  |  |            |
| NW_005087564.1          | 19249592-19262951 | 102112109   | SRR768235  | Passerines               | Pseudopodoces humilis        | Ground tit              |                         | 23    | <b>56</b>  | 18    | <b>44</b> |       |       |                      |  |  |            |
| NC_031779.1             | 19145635-19150648 | 107209139   | SRR3955331 | Passerines               | Parus major                  | Great tit               |                         | 25    | <b>32</b>  | 54    | <b>68</b> |       |       |                      |  |  |            |
| NW_014650706.1          | 1048593-1060262   | 106860135   | SRR3990507 | Passerines               | Sturnus vulgaris             | Common starling         | ALSL                    | 7     | <b>7</b>   | 94    | <b>93</b> |       |       |                      |  |  |            |
| NW_007931134.1          | 16689454-16696031 | 103816257   | SRR2915372 | Passerines               | Serinus canaria              | Common canary           | ALSL                    | 835   | <b>68</b>  | 392   | <b>32</b> |       |       |                      |  |  |            |
| NW_017219526.1          | 1317935-1327225   | 103757016   | SRR3476292 | Passerines               | Manacus vitellinus           | Golden-collared manakin |                         | 2416  | <b>79</b>  | 312   | <b>10</b> | 397   | 3105  | <b>11</b>            |  |  |            |
| NW_016690356.1          | 99142-119184      | 108504826   | SRR3493972 | Passerines               | Lepidothrix coronata         | Blue-crowned manakin    |                         | 1745  | <b>76</b>  | 237   | <b>10</b> | 391   | 2400  | <b>14</b>            |  |  |            |
| NW_018113967.1          | 5243961-5249928   | 104684065   | SRR1947400 | Passerines               | Corvus cornix cornix         | Hooded crow             |                         | 125   | <b>57</b>  | 96    | <b>43</b> |       |       |                      |  |  |            |
| NW_018657095.1          | 109336-132945     | 110477559   | SRR5223631 | Passerines               | Lonchura striata domestica   | Bengalese finch         |                         | 1325  | <b>34</b>  | 1888  | <b>48</b> | 620   | 2767  | <b>18</b>            |  |  |            |
| NW_002197120.1          | 1-14870           | 100190140   | SRR2545949 | Passerines               | Taeniopygia guttata          | Zebra finch             |                         | 56    | <b>88</b>  | 8     | <b>13</b> |       |       |                      |  |  |            |

| NCBI Reference Sequence | Region            | RNA-Seq SRA |            | Higher taxon name | RNA source                       | Treatment                | notes                   | +VLSL |           |       | -VLSL     |       |       | ex 5 skipping ex 5-6 |  |            |
|-------------------------|-------------------|-------------|------------|-------------------|----------------------------------|--------------------------|-------------------------|-------|-----------|-------|-----------|-------|-------|----------------------|--|------------|
|                         |                   | GeneID no.  | ID no.     |                   |                                  |                          |                         | reads | %         | reads | %         | reads | reads | %                    |  |            |
| NT_455925.1             | 1152927-1173155   | 415562      | SRR2072645 | Galliformes       | DF1 chicken fibroblast cells     | mock, empty DNA          |                         | 304   | <b>83</b> | 63    | <b>17</b> |       |       |                      |  |            |
| NT_455925.1             | 1152927-1173155   | 415562      | SRR2072646 | Galliformes       | DF1 chicken fibroblast cells     | pl:C, empty DNA          |                         | 617   | <b>82</b> | 136   | <b>18</b> |       |       |                      |  |            |
| NT_455925.1             | 1152927-1173155   | 415562      | SRR2072647 | Galliformes       | DF1 chicken fibroblast cells     | mock, IRF7 DNA           |                         | 637   | <b>78</b> | 175   | <b>22</b> |       |       |                      |  |            |
| NT_455925.1             | 1152927-1173155   | 415562      | SRR2072648 | Galliformes       | DF1 chicken fibroblast cells     | pl:C IRF7 DNA            |                         | 379   | <b>83</b> | 80    | <b>17</b> |       |       |                      |  |            |
| NT_455925.1             | 1152927-1173155   | 415562      | SRR2072649 | Galliformes       | DF1 chicken fibroblast cells     | mock, sh-control         |                         | 509   | <b>76</b> | 163   | <b>24</b> |       |       |                      |  |            |
| NT_455925.1             | 1152927-1173155   | 415562      | SRR2072650 | Galliformes       | DF1 chicken fibroblast cells     | pl:C, sh-control         |                         | 216   | <b>74</b> | 74    | <b>26</b> |       |       |                      |  |            |
| NT_455925.1             | 1152927-1173155   | 415562      | SRR2072651 | Galliformes       | DF1 chicken fibroblast cells     | mock, shIRF7             |                         | 492   | <b>75</b> | 165   | <b>25</b> |       |       |                      |  |            |
| NT_455925.1             | 1152927-1173155   | 415562      | SRR2072652 | Galliformes       | DF1 chicken fibroblast cells     | pl:C, shIRF7             |                         | 249   | <b>77</b> | 76    | <b>23</b> |       |       |                      |  |            |
| NT_455925.1             | 1152927-1173155   | 415562      | SRR1284638 | Galliformes       | Leghorn chicken (susceptible)    | mock                     |                         | 216   | <b>81</b> | 52    | <b>19</b> |       |       |                      |  |            |
| NT_455925.1             | 1152927-1173155   | 415562      | SRR1284637 | Galliformes       | Leghorn chicken (susceptible)    | infected, influenza H5N3 |                         | 233   | <b>75</b> | 79    | <b>25</b> |       |       |                      |  |            |
| NT_455925.1             | 1152927-1173155   | 415562      | SRR1284640 | Galliformes       | Fayoumi chicken (resistant)      | mock                     |                         | 144   | <b>80</b> | 35    | <b>20</b> |       |       |                      |  |            |
| NT_455925.1             | 1152927-1173155   | 415562      | SRR1284639 | Galliformes       | Fayoumi chicken (resistant)      | infected, influenza H5N3 |                         | 130   | <b>72</b> | 51    | <b>28</b> |       |       |                      |  |            |
| NC_000015.10            | 68778535-68820922 | 8125        | SRR5458553 | Mammalia          | A549 human lung epithelial cells | mock                     | <i>no insert/repeat</i> |       |           |       |           |       |       |                      |  | <b>100</b> |
| NC_000015.10            | 68778535-68820922 | 8125        | SRR5458559 | Mammalia          | A549 human lung epithelial cells | infected, influenza H7N9 | <i>no insert/repeat</i> |       |           |       |           |       |       |                      |  | <b>100</b> |

required modification
